# Supplementary material
Source: ML conference proceedings conference paper supplement (https://proceedings.neurips.cc/paper_files/paper/2021/hash/46031b3d04dc90994ca317a7c55c4289-Abstract.html)
Supplement: Supplementary file 1 [file 46031b3d04dc90994ca317a7c55c4289-Supplemental.zip]

Archive with 2 entries (2 files):
- supplemental.pdf
- video.mp4
